# Supplementary material for: Genome Mining of Fungal Unique Trichodiene Synthase-like Sesquiterpene Synthases
Source: MDPI journal article supplement (doi:10.3390/jof10050350), 2024-05-13
Supplement: s1 [file s1]

# **Journal of Fungi**

## **Supplementary material**

### **Genome mining of fungal unique trichodiene synthase-like sesquiterpene synthases**

Zhanren Cong<sup>1</sup>, Qiang Yin<sup>1</sup>, Kunhong Tian<sup>1</sup>, Njeru Joe Mukoma<sup>1</sup>, Liming Ouyang<sup>1</sup>, Tom Hsiang<sup>2</sup>, Lixin Zhang<sup>1</sup>, Lan Jiang<sup>3,\*</sup> and Xueting Liu<sup>1,\*</sup>

<sup>1</sup>State Key Laboratory of Bioreactor Engineering, East China University of Science of Technology, Shanghai 200237, China

<sup>2</sup>School of Environmental Sciences, University of Guelph, 50 Stone Road East, Guelph, Ontario N1G2W1, Canada

<sup>3</sup>Department of Cardiothoracic Surgery, Children's Hospital of Nanjing Medical University, Nanjing 210093, China

\*Corresponding authors:

Xueting Liu, E-mail: liuxueting@ecust.edu.cn;

Lan Jiang, E-mail: jianglan0426@163.com

## Contents

|                                                                                |    |
|--------------------------------------------------------------------------------|----|
| Supplementary Text .....                                                       | 3  |
| Sequence of pUARA4.....                                                        | 3  |
| Supplementary Figures .....                                                    | 7  |
| Figure S1. Number of TDTs by genome size.. .....                               | 7  |
| Figure S2. Density of TDTs in different fungi class.....                       | 7  |
| Figure S3. BGCs of active TDTs.....                                            | 8  |
| Figure S4. BGCs of inactive TDTs.....                                          | 8  |
| Figure S5. Alignment of reported TDTs and selected TDTs in this study. ....    | 9  |
| Figure S6. The mass spectra of all sesquiterpene skeletons in this study. .... | 10 |
| Supplementary Tables .....                                                     | 11 |
| Table S1. Reported fungal TDTs extracted from public database and PubMed. .... | 11 |
| Table S2. Reported fungal TPTs extracted from public database and PubMed. .... | 12 |
| Table S3. TDTs selected for heterologous expression.....                       | 15 |
| Table S4. Primers used in this study. ....                                     | 16 |
| Table S5. Plasmids and transformants constructed in this study. ....           | 18 |

## Supplementary Text

### Sequence of pUARA4

AGCGCCCAATACGCAAACCGCCTCTCCCCGCGCGTTGGCCGATTCATTAAT  
GCAGCTGGCACGACAGGTTTCCCGACTGGAAAGCGGGCAGTGAGCGCAA  
CGCAATTAATGTGAGTTAGCTCACTCATTAGGCACCCCAGGCTTTACACTTT  
ATGCTTCCGGCTCGTATGTTGTGTGGAATTGTGAGCGGATAACAATTTACACA  
CAGGAAACAGCTATGACCATGATTACGATATCATGGTGTTTTGATCATTTTA  
AATTTTTATATGGCGGGTGGTGGGCAACTCGCTTGCGCGGGCAACTCGCTT  
ACCGATTACGTTAGGGCTGATATTTACGTAAAAATCGTCAAGGGATGCAAG  
ACCAAAGTAGTAAAACCCCGGAGTCAACAGCATCCAAGCCCAAGTCCTTC  
ACGGAGAAACCCAGCGTCCACATCACGAGCgaaggaccaccttaggcacggacgcac  
catCCAATTAGAAGCAGCAAAGCGAAACAGCCCAAGAAAAAGGTTCGGCCCCG  
TCGGCCTTTTCTGCAACGCTGATCACGGGCAGCGATCCAACCAACACCCTC  
CAGAGTGACTAGGGGCGGAAATTTAAAGGGATTAATTTCCACTCAACCACA  
AATCACAGTCGTCCCCGGTATTGTCCTGCAGAATGCAATTTAAACTCTTCTG  
CGAATCGCTTGGATTCCCCGCCCTGGCCGTAGAGCTTAAAGTATGTCCCTT  
GTCGATGCGATGTATCACAACATATAAATACTAGCAAGGGATGCCATGCTTG  
GAGGATAGCAACCGACAACATCACATCAAGCTCTCCCTTCTCTGAACAATA  
AACCCACAGCgaagctccgAATTCGAGCTCGGTACCCGGGGATCttagtagctcgtgaa  
GGGTGGAGAGTATATGATGGTACTGCTATTCAATCTGGCATTGGACAGTGAG  
TTTGAGTTTGATGTACAGTTGGAGTCGTTACTGCTGTCATCCCCTTATACTCT  
TCGATTGTTTTTCGAACCCTAACGCCAAGCACGCTAGTCTATTATAGGAAAG  
GATcCAGGAAACAGCTATGACCATGATTACGATATCATGGTGTTTTGATCATT  
TTAAATTTTTATATGGCGGGTGGTGGGCAACTCGCTTGCGCGGGCAACTCG  
CTTACCGATTACGTTAGGGCTGATATTTACGTAAAAATCGTCAAGGGATGCA  
AGACCAAAGTAGTAAAACCCCGGAGTCAACAGCATCCAAGCCCAAGTCCT  
TCACGGAGAAACCCAGCGTCCACATCACGAGCgaaggaccaccttaggcacggacgc  
accatccaattagaagcagcaaagcgaaacagcccaagaaaaaggtcggcccgtcggccttttctgcaacgctgatcacg  
ggcagcgatccaaccaacacctccagagtgactagggcggaatttaaagggattaatttccactcaaccacaaatcac  
agtcgtccccggtattgtcctgcagaatgaatttaaactcttctgcgaatcgttgattccccgcccttgccgtagagctt  
aaagtatgtcccttgatgcgatgtatcacacataataactagcaagggatgccatgcttgaggatagcaaccgac  
aacatcacatcaagctctcccttctctgaacaataaacccacagcaagctccgTTAATTAAATTTAAATcatat  
gcacgtggggtggagagtatatgatggtactgtattcaatctggcattggacagtgagtttgatttgatgtacagttggagt  
cgttactgctgtcatcccttatactcttcgattgttttcgaacctAACGCCAAGCACGCTAGTCTATTA  
TAGGAAAGGATcccaggaaacagctatgacctgattacgatcatcatggtgtttgatcattttaattttatatggc  
gggtggtgggcaactcgttgcgcgggcaactcgttaccgattacgttagggctgatatttacgtaaaaatcgtaaggga  
tgcaagaccaaagtagtaaaaccccgagtcacagcatccaagcccaagtccttcacggagaaaccccgagtcacac  
tcacgagcgaaggaccaccttaggcacggacgcacatCCAATTAGAAGCAGCAAAGCGAAA  
CAGCCCAAGAAAAAGGTTCGGCCCCGTGGCCTTTTCTGCAACGCTGATCAC  
GGGCAGCGATCCAACCAACACCCTCCAGAGTGACTAGGGGCGGAAATTTA  
AAGGGATTAATTTCCACTCAACCACAAATCACAGTCGTCCCCGGTATTGTC  
CTGCAGAATGCAATTTAAACTCTTCTGCGAATCGCTTGGATTCCCCGCCCT

GGCCGTAGAGCTTAAAGTATGTCCCTTGTTCGATGCGATGTATCACAAACATAT  
AAATACTAGCAAGGGATGCCATGCTTGGAGGATAGCAACCGACAACATCAC  
ATCAAGCTCTCCCTTCTCTGAACAATAAACCCACAGCAAGCTCCGAATTC  
GAATCGATTTGAGCTAGCGGCCTCGTACCCGATGATGAAACATAATGGACA  
AGTTGGTGAAAGGTTGGGCCAGAGGTTGGACGGTCGTGAGGGTTATATTG  
GGGACGGTGAATATATATAGGAACATCGTTCCCTTATAGTGCGGATGGTGTGG  
TAAGTATAGACTTTGGATGAAATTCGTTTTTGGATAATTGTGTTCAGTATATGA  
TTTGGTGTGGTCTTTTCGTTTGATTTTAGCATAGGTGTTATGGGACGTTAAG  
ACTCTTCCACCCAGGAAACAGCTATGACCATGATTACGATATCATGGTGT  
TGATCATTTTAAATTTTATATGGCGGGTGGTGGGCAACTCGCTTGCGCGGG  
CAACTCGCTTACCGATTACGTTAGGGCTGATATTTACGTAAAAATCGTCAAG  
GGATGCAAGACCAAAGTAGTAAAACCCCGGAGTCAACAGCATCCAAGCCC  
AAGTCCTTCACGGAGAAACCCAGCGTCCACATCACGAGCgaaggaccacctag  
gcacgcgacgcaccatccaattagaagcagcaaagcgaaacagcccaagaaaaaggtcgcccgctggccctttctgca  
acgctgatcacgggcagcgatccaaccaacacctccagagtactagggcggaatttaaagggaatttccactca  
accacaaatcacagtcgtcccggtattgtcctgcagaatgcaattaaactcttctgcgaatcgcttgattccccgcccctg  
gccgtagagcttaagtagtccctgtcgatgcgatgtatcacacataataactagcaagggtgcatgcttgaggga  
tagcaaccgacaacatcacatcaagctctccctctctgaacaataaacccacagcaagctccgGGCCGCACTA  
GTGACCCGGGTAGTCGTACCCGATGATGAAACATAATGGACAAGTTGGTGGA  
AAGGTTGGGCCAGAGGTTGGACGGTCGTGAGGGTTATATTGGGGACGGTG  
AATATATATAGGAACATCGTTCCTTATAGTGCGGATGGTGTGGTAAGTATAGA  
CTTTGGATGAAATTCGTTTTTGGATAATTGTGTTCAGTATATGATTTGGTGTGG  
TCTTTTCGTTTGATTTTAGCATAGGTGTTATGGGACGTTAAGACTCTTCCAC  
CAAGAATAAATGTATTCTTGTATACTACAAAAGTACCAAATACTCCAATGA  
GGAGTCTCGGTTAGGATAACTAACCAGAACGGCAGATCCTCTAGACTGATG  
ATGCAGTGGTTCGTTACATTCTGCTCTTGAAGATTGGAGTCGCTAAAATG  
AATAGGAGTTGAGCTCTTGCTTCGGGTGTGGTGGCGGGCGCGTGAGCCAC  
TCCGGGAAGGCGCACGAGAGAGGACGCCGGGTGTCCCTGGGACCGAATA  
GCTAGACAAGTAGGAAGTTCTAGTGGGGTTGTCAATAGCCTCATTTCGCGG  
GGTGAAATAATCCTGTGGGTCTTTGTCCGACTCATTGTCTGTCGTCAATG  
GGGTAATGGGGAGTTAAAGGCGCGAGTGAGATGCGGTTTAAGGATGGATA  
AGAGCGGCGGGGCCGAGCTTGTGATGCCGAGGACTGTTTCAGCTTTGTTAG  
CGAATCAGCAGGATTGTGGATGTAGTAAAgtcgacctacagccattgcgaaacctcagaagaat  
gtgctggatagaggtcaagagtatggaatgaggagagtcgaggggtgggtgtgtaggcctggatctaccttggttagga  
cgactccgcattcgtgacatgtgaaagtcaccgggtgcgatttgccccattccaatactctgagtaataaaggaagcgag  
agaacatgtcaattagtatttgatatatgctagaaagaattggtcaggataaattgggaaaatgcttctactaacaggttttacg  
tgatcggagtaaatatatttagggacggaatgatctcataccgtcaactcatcagtttgataacgccagcctctatatatttaa  
atggaagcctgggtatatttattcaattttcccttattgacaacgaaacctccaaggcggaatcgagcccataaccggttc  
tcagcctcagggaagacaagtgaccggtgctgtagaaaacctcgtcgtgacctcctcagggtgtcgcgaggagacagt  
catgaactccagccctccttagctcctcctcgcttgccgagttcagcagtgatttgaaaccatcaactcctcagcctctg  
agccttctctcctcttgcccatagagaccaggtgtctgtgaccagaatatcgccgtccttgaccgcttctcggaatatt  
ggtttgagaagcttctggttcgagacacctctccagcagacttgatgagctccagcatgtgaggagggttctgacc  
ccttgaggtagcgacagcaatgtcgacaccttttttagcagcaatggccatatcgaacaggacgttggtggcgtcacc  
cacccaagcgatcttcaatcctccaaccttagacttgaaagggtgtgcgcttggggggtgaatgcttcatagatggtctgga

aatcgccacggcttgagaggggtgaaagagtcacacaaagcattgatgactggaaccgaagagtgttcgccagatct  
gcgacctctgcatgtttaccgacacgggtacaatgcaggataccatggacgaaatgacaacggaggtgtcgtataggga  
ctcgttgacacctagttggatatcatccttgcccaagaacatcgatgacctcccatctgcacaacggccccttctgtagata  
cccttgctctgtgttcgtttgctgaagatcatggccacagttttccaaggagtgtccctgcaagttttggggcattgacct  
cgacttgatagcccgtttgtgtgaggagggcattgcgaacaagggttgcgaactcggagggcgagaggtccgcaatggag  
aggaagtggcgggggagcaaagggtgaggcgggagggcatggtttgcgaggagtaggatcgcacgggtgtgtcgaagct  
ctggctcttgagtacggagcgaagggtgccattggaagtgaagaatatagatgttaaagaacttaaaagacttggggcg  
gaaagaaattgtggacagaacgagggcattccacaaataactgagaaatgattcgtgaatgactcataagtccgccagcag  
gagcttcgatcattggtaaagaacagagttagcggccctccgttcgctgatcacggatcacggccattgcatcaggccc  
ttgactctgctgataccttgaaactgtcacagtccttcacgtcctacctctcgttcctcatcaatatttctgcaattattgcatcgt  
tcatctctatttatctaatttatgtaaattatagtaaatgaggcctctaaactggtcatatctggcccgattcggcgtctgatcag  
cctcaacactatcgcatactctccacaatccacactttccccccactccgctttacacagcgttcgttatgacggatgaggc  
gagtcggcctctgttggcgagcatcacgacaataatgcttctccctatcaagcgtcgtctacaaatcaacagcgtcgtcct  
ttgaagtgtcttcggagtaacccccacttctccatcgccgcatgatgatatacggcgtagggtggtatagaGTCATC  
GCGGGCTTCCTCTGCTGCGTCCGGGTCTGTTTCATTAGATGACTACCCCAA  
AAAACCGCGAAATAAAGCTTGGTGGACGGTATTATGCGGCCTCCTTGCTGT  
CGGTTCCGTCATTGTCATCCTCATTCTGGCCTTCTTTGTTCCCGAGGTAGTA  
AAGCAATACGTCAAGGAAGCAGCCATATTTAGACCGACAAACCTATCAGTC  
GTGTCGGCCACAAGCGAAGGTGTCAGGGCAAGGGTACAAGGGGATATTGT  
CCTCGATGCTGATCGAGTCAAAAGTGAATCGGCGAGAAATATTGGGCGTTT  
CGTCACCTGGATTGGGAAAGAGGTGCAAACCGGCCAGTCTGAAGTAATTG  
TACGCTTACCGGAATACGAAAATGCCCTTGTTGGATCTGCATCCTTGCCCTC  
CATCAAGGTTAGCATTCGCAACGGCCATGTGAATCACCTTGACTTCGAAGC  
CGATTTGATTGCTGGCGACATTGAGGGCTTGCGCTCCGTCGCCGTCGACTG  
GCTGGAAGGGAGACTGGACCGTCTATTACTTCATGGAAGTGTCATTCTCCAT  
ATCAAATCAGGCCTGCTGAGCCTGGGAGAGCAGACTCTAGAGTCGACCTG  
CAGGCATGCAAGCTTGGCACTGGCCGTCGTTTTTACAACGTCGTGACTGGGA  
AAACCCTGGCGTTACCCAACCTAATCGCCTTGCAGCACATCCCCCTTTCGC  
CAGCTGGCGTAATAGCGAAGAGGCCCGCACCGATCGCCCTTCCCAACAGTT  
GCGCAGCCTGAATGGCGAATGGCGCCTGATGCGGTATTTTCTCCTTACGCAT  
CTGTGCGGTATTTACACCGCATACGTCAAAGCAACCATAGTACGCGCCCT  
GTAGCGGCGCATTAAAGCGCGGCGGGTGTGGTGGTTACGCGCAGCGTGACC  
GCTACACTTGCCAGCGCCCTAGCGCCCGCTCCTTTTCGCTTTCTTCCCTTCCT  
TTCTCGCCACGTTTCGCCGGCTTTCCCCGTCAAGCTCTAAATCGGGGGCTCC  
CTTTAGGGTTCCGATTTAGTGCTTTACGGCACCTCGACCCCAAAAACTTG  
ATTTGGGTGATGGTTCACGTAGTGGGCCATCGCCCTGATAGACGGTTTTTCG  
CCCTTTGACGTTGGAGTCCACGTTCTTTAATAGTGGACTCTTGTTCCAACT  
GGAACAACACTCAACCCTATCTCGGGCTATTCTTTTGATTATAAGGGATTT  
TGCCGATTTTCGGCCTATTGGTTAAAAAATGAGCTGATTTAACAAAAATTTAA  
CGGAATTTTAACAAAATATTAACGTTTACAATTTTATGGTGCACCTCTCAGT  
ACAATCTGCTCTGATGCCGCATAGTTAAGCCAGCCCCGACACCCGCCAACA  
CCCGCTGACGCGCCCTGACGGGCTTGTCTGCTCCCGGCATCCGCTTACAGA  
CAAGCTGTGACCGTCTCCGGGAGCTGCATGTGTCAGAGGTTTTACCCGTCA  
TCACCGAAACGCGCGAGACGAAAGGGCCTCGTGATACGCCTATTTTTATAG

GTAAATGTCATGATAATAATGGTTTCTTAGACGTCAGGTGGCACTTTTCGGG  
GAAATGTGCGCGGAACCCCTATTTGTTTATTTTCTAAATACATTCAAATATG  
TATCCGCTCATGAGACAATAACCCTGATAAATGCTTCAATAATATTGAAAAA  
GGAAGAGTATGAGTATTCAACATTTCCGTGTCGCCCTTATTCCCTTTTTTGC  
GGCATTTTGCCTTCCTGTTTTTGTCTACCCAGAAACGCTGGTGAAAGTAAA  
AGATGCTGAAGATCAGTTGGGTGCACGAGTGGGTACATCGAACTGGATCT  
CAACAGCGGTAAGATCCTTGAGAGTTTTTCGCCCCGAAGAACGTTTTTCCAAT  
GATGAGCACTTTTAAAGTTCTGCTATGTGGCGCGGTATTATCCCGTATTGAC  
GCCGGGCAAGAGCAACTCGGTGCGCGCATACACTATTCTCAGAATGACTTG  
GTTGAGTACTCACCAGTCACAGAAAAGCATCTTACGGATGGCATGACAGTA  
AGAGAATTATGCAGTGCTGCCATAACCATGAGTGATAAACTGCGGCCAAC  
TACTTCTGACAACGATCGGAGGACCGAAGGAGCTAACCGCTTTTTTGCAC  
AACATGGGGGATCATGTAACCTCGCCTTGATCGTTGGGAACCGGAGCTGAAT  
GAAGCCATACCAAACGACGAGCGTGACACCACGATGCCTGTAGCAATGGC  
AACAACGTTGCGCAAACCTATTAACCTGGCGAACTACTTACTCTAGCTTCCCG  
GCAACAATTAATAGACTGGATGGAGGCGGATAAAGTTGCAGGACCACTTCT  
GCGCTCGGCCCTTCCGGCTGGCTGGTTTATTGCTGATAAATCTGGAGCCGG  
TGAGCGTGGGTCTCGCGGTATCATTGCAGCACTGGGGCCAGATGGTAAGCC  
CTCCCGTATCGTAGTTATCTACACGACGGGGAGTCAGGCAACTATGGATGAACGA  
AATAGACAGATCGCTGAGATAGGTGCCTCACTGATTAAGCATTGGTAACTGTCAGACCA  
AGTTTACTCATATATACTTTAGATTGATTTAAAACTTCATTTTTTAATTTAAAGGATCTAG  
GTGAAGATCCTTTTTTGATAATCTCATGACCAAAATCCCTTAACGTGAGTTTTTCGTTCCAC  
TGAGCGTCAGACCCCGTAGAAAAGATCAAAGGATCTTCTTGAGATCCTTTTTTTCTGCG  
CGTAATCTGCTGCTTGCAAACAAAAAAACCACCGCTACCAGCGGTGGTTTGTGTTGCCG  
GATCAAGAGCTACCAACTCTTTTTCCGAAGGTAACCTGGCTTCAGCAGAGCGCAGATAC  
CAAATACTGTCCTTCTAGTGTAGCCGTAGTTAGGCCACCACTTCAAGAACTCTGTAGCA  
CCGCCTACATACCTCGCTCTGCTAATCCTGTTACCACTGGCTGCTGCCAGTGGCGATAA  
GTCGTGTCTTACCGGGTTGGACTCAAGACGATAGTTACCGGATAAGGCGCAGCGGTCTG  
GGCTGAACGGGGGGTTTCGTGCACACAGCCCAGCTTGGAGCGAACGACCTACACCGAA  
CTGAGATACCTACAGCGTGAGCTATGAGAAAGCGCCACGCTTCCCGAAGGGAGAAAG  
GCGGACAGGTATCCGGTAAGCGGCAGGGTCGGAACAGGAGAGCGCACGAGGGAGCT  
TCCAGGGGGAAACGCCTGGTATCTTTATAGTCCTGTCGGGTTTCGCCACCTCTGACTTG  
AGCGTCGATTTTTGTGATGCTCGTCAGGGGGGCGGAGCCTATGGAAAAACGCCAGCAA  
CGCGGCCTTTTTACGGTTCCTGGCCTTTTGCTGGCCTTTTGCTCACATGTTCTTCTCCTGC  
GTTATCCCCTGATTCTGTGGATAACCGTATTACCGCCTTTGAGTGAGCTGATACCGCTCG  
CCGCAGCCGAACGACCGAGCGCAGCGAGTCAGTGAGCGAGGAAGCGGAAG

## Supplementary Figures

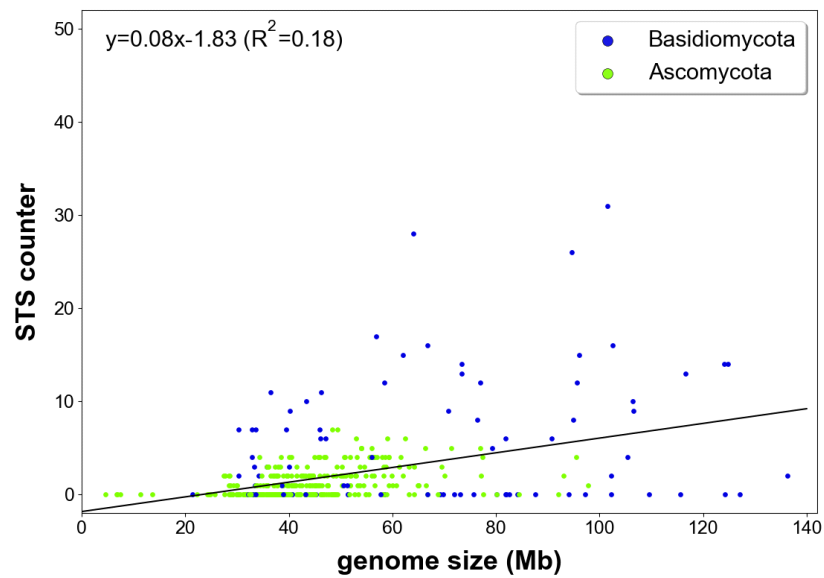

**Figure S1.** Number of TDTs by genome size. Each point represented one fungi strain. Strains from Basidiomycota were labeled as blue. Strains from Ascomycota were labeled as green.

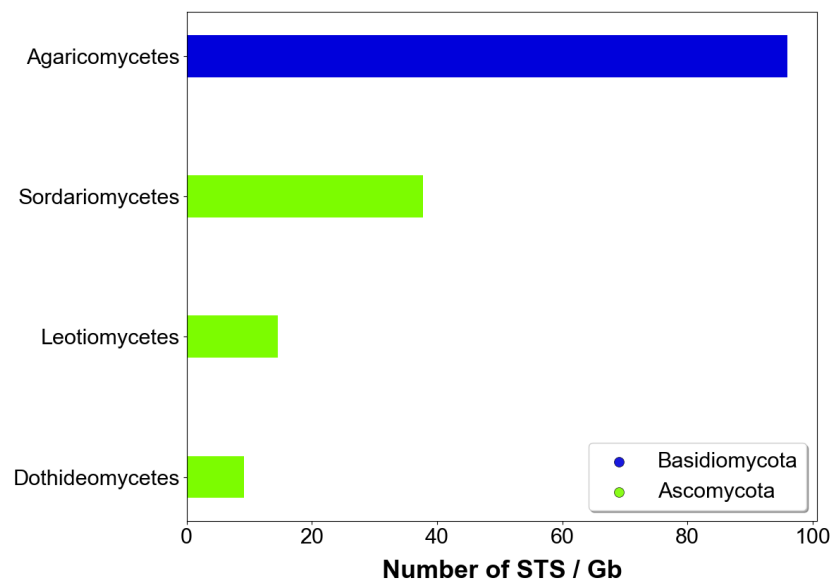

**Figure S2.** Density of TDTs in different fungi class. Class from Basidiomycota were labeled as blue. Class from Ascomycota were labeled as green.

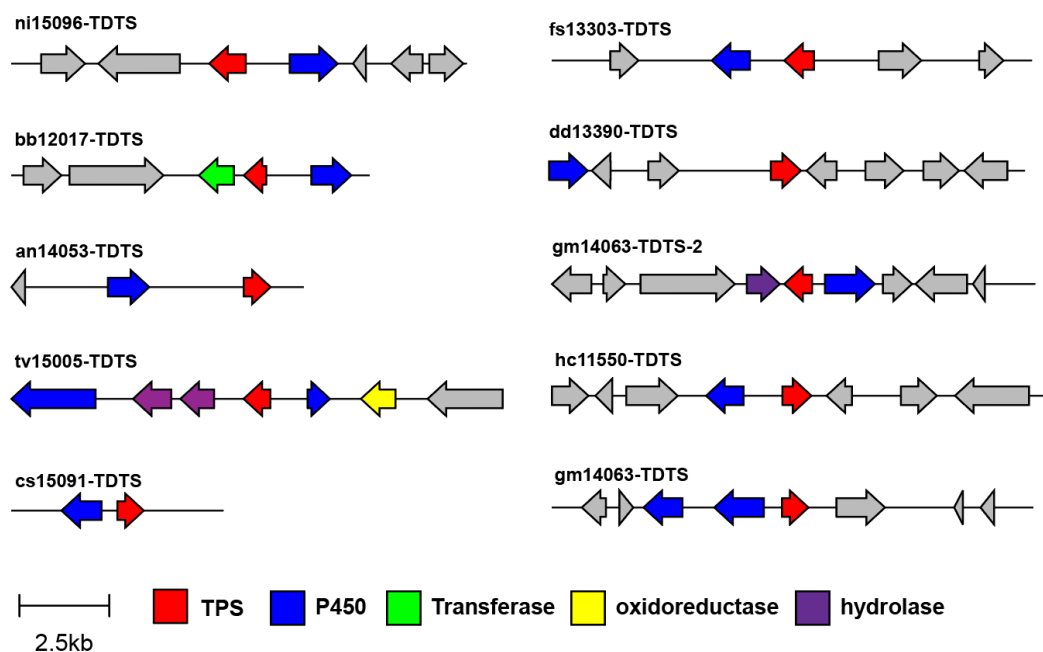

**Figure S3.** BGCs of active TDTs.

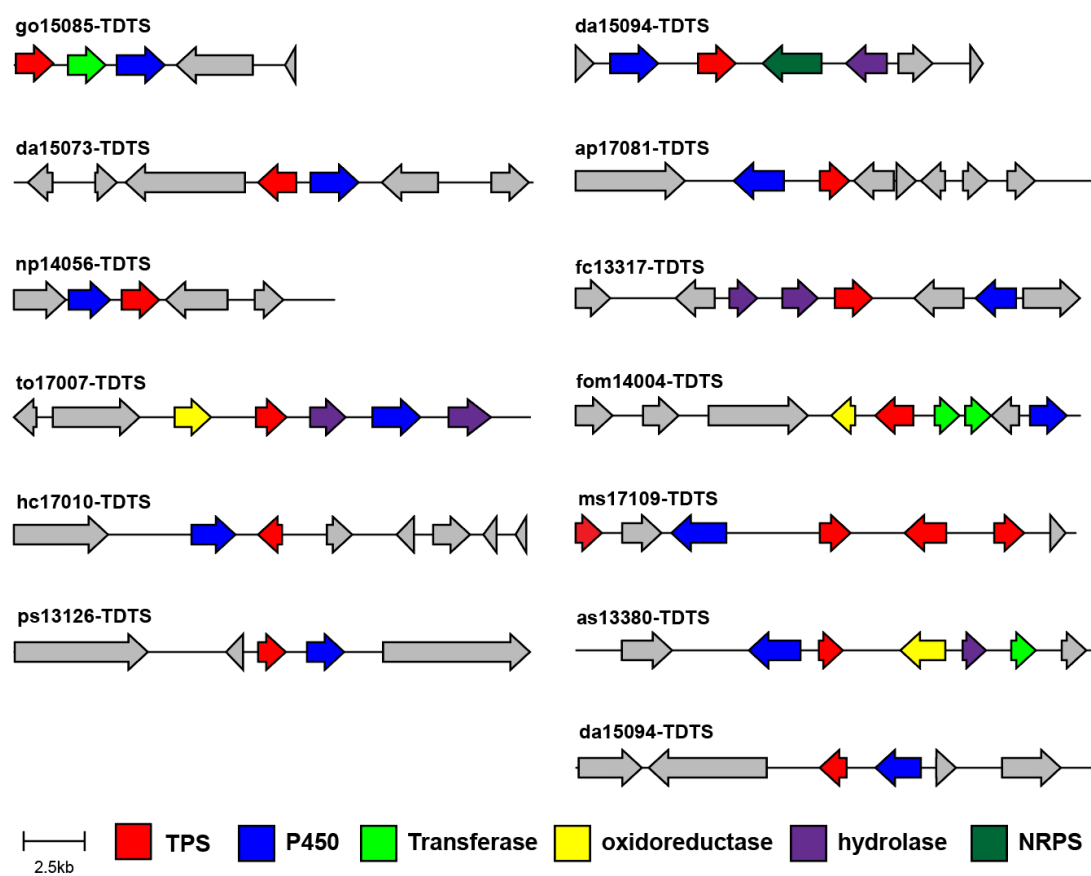

**Figure S4.** BGCs of inactive TDTs.





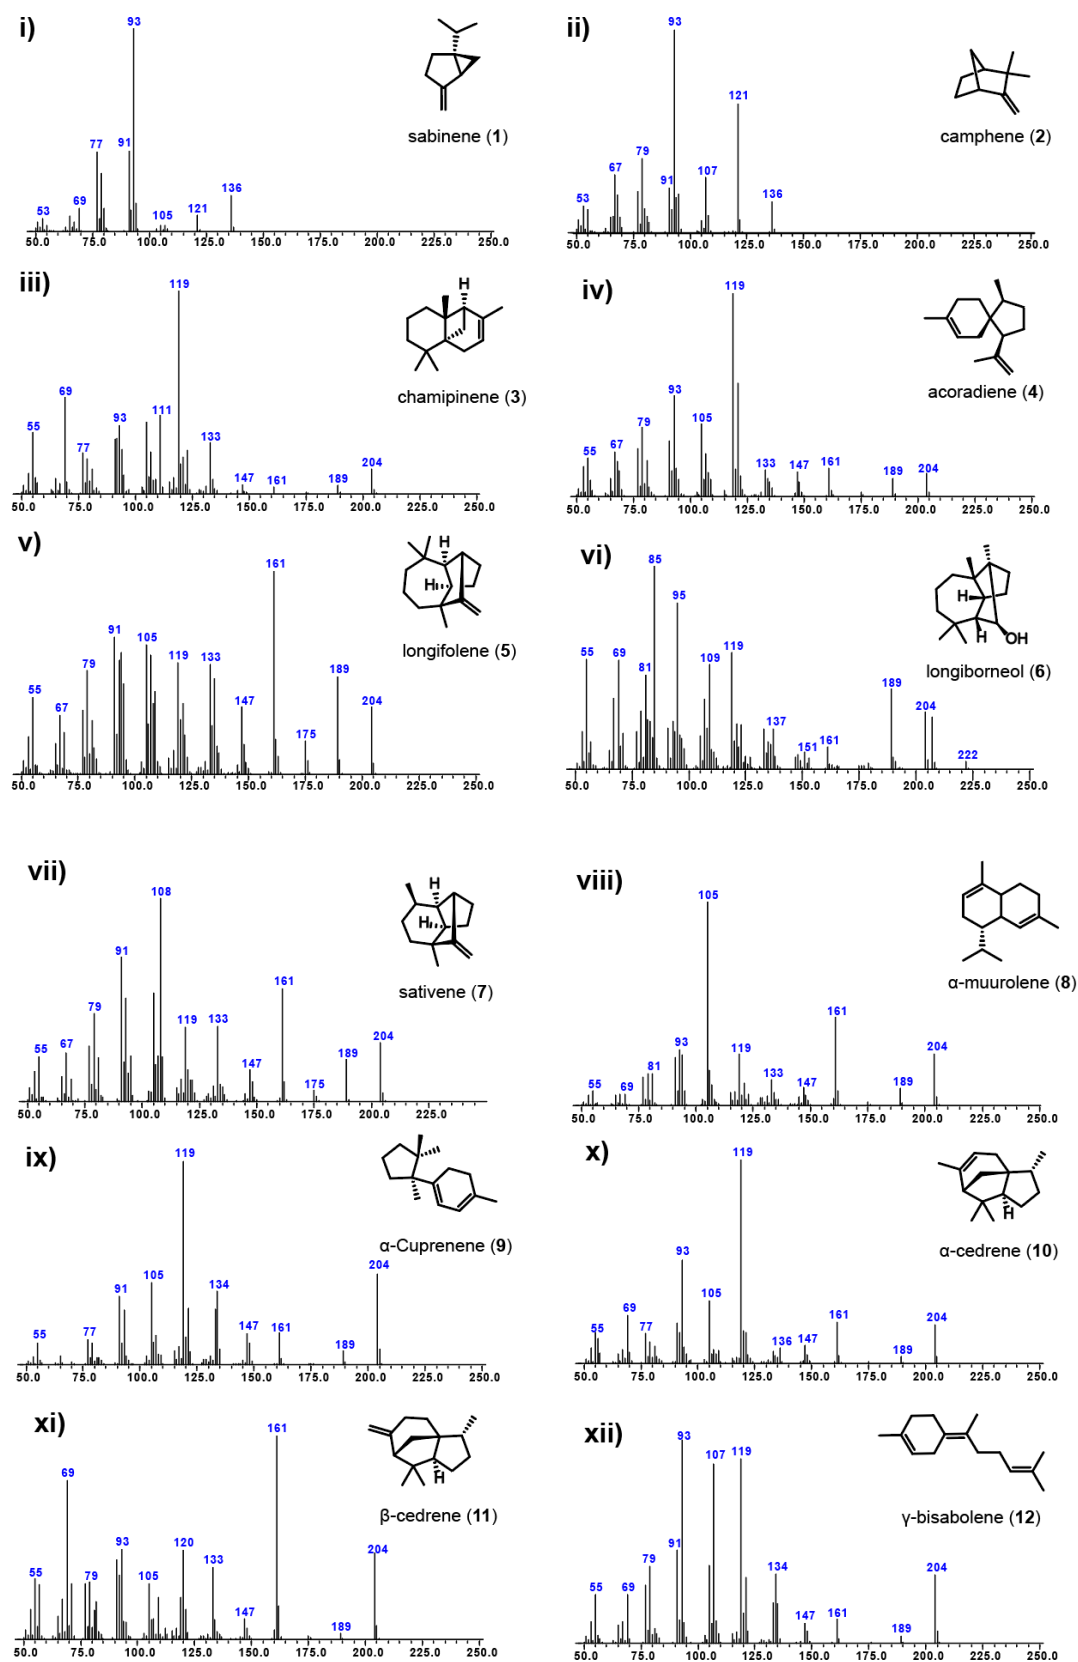

**Figure S6.** The mass spectra of all sesquiterpene skeletons in this study.

## Supplementary Tables

**Table S1.** Reported fungal TDTs extracted from public database and PubMed.

| Accession     | ID      | Organism                           | Product                   | Intermediate | Ref. |
|---------------|---------|------------------------------------|---------------------------|--------------|------|
| PubMed        | DtSTS09 | <i>Desarmillaria tabescens</i>     | Cis-thujosene             | Bisabolene   | [1]  |
| PubMed        | DtSTS10 | <i>Desarmillaria tabescens</i>     | $\alpha$ -Cuprenene       | Bisabolene   |      |
| KAG2008248    | Cop6    | <i>Coprinus cinereus</i>           | $\alpha$ -cuprenene       | Bisabolene   | [2]  |
| JGI ID: 3258  | Omp9    | <i>Omphalotus olearius</i>         | $\alpha$ -Barbatene       | Bisabolene   | [3]  |
| JGI ID: 3981  | Omp10   | <i>Omphalotus olearius</i>         | Dauca-4(11),8-diene       | others       |      |
| PubMed        | ShSTS1  | <i>Stereum hirsutum</i>            | $\beta$ -barbatene        | Bisabolene   | [4]  |
| JGI ID: 84944 | Fompi1  | <i>Fomitopsis schrenkii</i>        | $\alpha$ -Cuprenene       | Bisabolene   | [3]  |
| PubMed        | TvSTS14 | <i>Trametes versicolor</i>         | $\beta$ -barbatene        | Bisabolene   | [5]  |
| PubMed        | TvSTS16 | <i>Trametes versicolor</i>         | Dauca-4(11),8-diene       | others       |      |
| PubMed        | LnSTS20 | <i>Lepista nuda</i>                | $\beta$ -barbatene        | Bisabolene   |      |
| PubMed        | AbSTS09 | <i>Agaricus bisporus</i>           | (Z)- $\alpha$ -bisabolene | Bisabolene   |      |
| PubMed        | AbSTS07 | <i>Agaricus bisporus</i>           | $\delta$ -Cadinene        | germacrene   |      |
| PubMed        | PoSTS16 | <i>Pleurotus ostreatus</i>         | $\alpha$ -Cuprenene       | Bisabolene   |      |
| IIS104.1      | D1M8S2  | <i>Fusarium graminearum</i>        | Longiborneol              | Humulene     | [6]  |
| B8NHE0.1      | FlvE    | <i>Aspergillus flavus</i>          | Acoradiene                | Bisabolene   | [7]  |
| XP_001885710  | LbSTS6  | <i>Laccaria bicolor</i>            | $\alpha$ -Cuprenene       | Bisabolene   | [8]  |
| Q00909.1      | Q00909  | <i>Fusarium graminearum</i>        | Trichodiene               | Bisabolene   | [9]  |
| G0LES5.1      | G0LES5  | <i>Trichoderma arundinaceum</i>    | Trichodiene               | Bisabolene   | [9]  |
| P13513.1      | P13513  | <i>Trichoderma arundinaceum</i>    | Trichodiene               | Bisabolene   | [9]  |
| P27679.1      | P27679  | <i>Gibberella pulicaris</i>        | Trichodiene               | Bisabolene   | [9]  |
| Q00835.1      | Q00835  | <i>Fusarium poae</i>               | Trichodiene               | Bisabolene   | [9]  |
| O13489.1      | O13489  | <i>Paramyrothecium roridum</i>     | Trichodiene               | Bisabolene   | [9]  |
| A0A348B793.1  | PpSTS25 | <i>Postia placenta</i>             | linalool                  | others       | [10] |
| KGO75161.1    | PitB    | <i>Penicillium italicum</i>        | Nerol                     | others       | [11] |
| PubMed        | PcSTS06 | <i>Phanerodontia chrysosporium</i> | a-barbatene               | Bisabolen    | [12] |
| PubMed        | PcSTS08 | <i>Phanerodontia chrysosporium</i> | $\alpha$ -bisabolene      | Bisabolen    | [12] |
| PubMed        | PcSTS11 | <i>Phanerodontia chrysosporium</i> | santalene                 | Bisabolen    | [12] |

**Table S2.** Reported fungal TPTSs extracted from public database and PubMed.

| Accession            | ID      | Organism                         | Major product         | Intermediate | Ref. |
|----------------------|---------|----------------------------------|-----------------------|--------------|------|
| <b>Basidiomycota</b> |         |                                  |                       |              |      |
| QDF59313.1           | Hfas94a | <i>Hypholoma fasciculare</i>     | humulene              | humulene     | [13] |
| QDF59314.1           | Hfas94b | <i>Hypholoma fasciculare</i>     | caryophyllene         | humulene     |      |
| QDF59315.1           | Hfas344 | <i>Hypholoma fasciculare</i>     | humulene              | humulene     |      |
| PubMed               | STC9    | <i>Termitomyces sp. J132</i>     | (-)-gamma-cadinene    | germacrene   | [14] |
| PubMed               | STC15   | <i>Termitomyces sp. J132</i>     | Germacrene-D-4-ol     | germacrene   |      |
| PubMed               | STC4    | <i>Termitomyces sp. J132</i>     | Intermedeol           | germacrene   |      |
| BBD74522.1           | PpSTS08 | <i>Postia placenta</i>           | delta-6-protoilludene | humulene     | [15] |
| JGI ID: 99496        | PpSTS03 | <i>Postia placenta</i>           | alpha-Cadinene        | germacrene   |      |
| BBD74520.1           | PpSTS06 | <i>Postia placenta</i>           | alpha-Gurjunene       | germacrene   |      |
| JGI ID: 98072        | PpSTS10 | <i>Postia placenta</i>           | delta-Cadinene        | germacrene   |      |
| BBD74517.1           | PpSTS01 | <i>Postia placenta</i>           | alpha-Muurolene       | germacrene   |      |
| JGI ID: 101549       | PpSTS14 | <i>Postia placenta</i>           | pentalenene           | humulene     |      |
| XP_007765978         | Copu3   | <i>Coniophora puteana</i>        | Cubebol               | germacrene   | [16] |
| XP_007771895         | Copu2   | <i>Coniophora puteana</i>        | beta-Copaene          | germacrene   |      |
| KX281943.1           | GME6364 | <i>Lignosus rhinocerotis</i>     | (+)-torreyol          | germacrene   |      |
| KX281944.1           | GME6368 | <i>Lignosus rhinocerotis</i>     | alpha-cadinol         | germacrene   | [17] |
| JGI ID: 1311         | Omp1    | <i>Omphalotus olearius</i>       | alpha-Muurolene       | germacrene   |      |
| JGI ID: 1447         | Omp4    | <i>Omphalotus olearius</i>       | delta-cadinene        | germacrene   |      |
| JGI ID: 2271         | Omp7    | <i>Omphalotus olearius</i>       | delta-6-protoilludene | humulene     |      |
| JGI ID: 2392         | Omp5a   | <i>Omphalotus olearius</i>       | gamma-cadinene        | germacrene   |      |
| JGI ID: 2393         | Omp5b   | <i>Omphalotus olearius</i>       | gamma-cadinene        | germacrene   |      |
| JGI ID: 4636         | Omp3    | <i>Omphalotus olearius</i>       | alpha-Muurolene       | germacrene   |      |
| JGI ID: 4774         | Omp6    | <i>Omphalotus olearius</i>       | delta-6-protoilludene | humulene     |      |
| A8NE23               | Cop6    | <i>Coprinopsis cinerea</i>       | alpha-muurolene       | germacrene   |      |
| EAU85264             | Cop2    | <i>Coprinopsis cinerea</i>       | Germacrene A          | germacrene   | [18] |
| EAU85540             | Cop4    | <i>Coprinopsis cinerea</i>       | delta-Cadinene        | germacrene   |      |
| EAU88892             | Cop3    | <i>Coprinopsis cinerea</i>       | alpha-Muurolene       | germacrene   |      |
| EAU89322             | Cop1    | <i>Coprinopsis cinerea</i>       | Germacrene A          | germacrene   |      |
| PubMed               | ShSTS12 | <i>Stereum hirsutum</i>          | alpha-cubebene        | germacrene   |      |
| PubMed               | ShSTS10 | <i>Stereum hirsutum</i>          | delta-cadinene        | germacrene   |      |
| PubMed               | ShSTS7  | <i>Stereum hirsutum</i>          | delta-cadinene        | germacrene   | [4]  |
| PubMed               | CPSTS18 | <i>Clitopilus pseudopinsitus</i> | gamma-cadinene        | germacrene   |      |
| PubMed               | ShSTS5  | <i>Stereum hirsutum</i>          | gamma-cadinene        | germacrene   |      |
| PubMed               | CPSTS2  | <i>Clitopilus pseudopinsitus</i> | delta-cadinene        | germacrene   |      |
| PubMed               | ShSTS8  | <i>Stereum hirsutum</i>          | alpha-cubebene        | germacrene   |      |
| PubMed               | ShSTS11 | <i>Stereum hirsutum</i>          | alpha-cubebene        | germacrene   |      |

|                |               |                                  |                       |            |      |
|----------------|---------------|----------------------------------|-----------------------|------------|------|
| PubMed         | CPSTS5        | <i>Clitopilus pseudopinsitus</i> | gamma-muurolene       | germacrene | [19] |
| PubMed         | CPSTS3        | <i>Clitopilus pseudopinsitus</i> | alpha-muurolene       | germacrene |      |
| PubMed         | CPSTS14       | <i>Clitopilus pseudopinsitus</i> | beta-elemene          | germacrene |      |
| PubMed         | CPSTS9        | <i>Clitopilus pseudopinsitus</i> | ledene                | germacrene |      |
| PubMed         | CPSTS13       | <i>Clitopilus pseudopinsitus</i> | ledene                | germacrene |      |
| PubMed         | CPSTS12       | <i>Clitopilus pseudopinsitus</i> | beta-elemene          | germacrene |      |
| PubMed         | CPSTS16       | <i>Clitopilus pseudopinsitus</i> | aristolene            | germacrene |      |
| PubMed         | CPSTS8        | <i>Clitopilus pseudopinsitus</i> | alloaromadendrene     | germacrene |      |
| PubMed         | CPSTS11       | <i>Clitopilus pseudopinsitus</i> | alloaromadendrene     | germacrene |      |
| PubMed         | CPSTS1        | <i>Clitopilus pseudopinsitus</i> | sterprene             | humulene   |      |
| PubMed         | CPSTS6        | <i>Clitopilus pseudopinsitus</i> | pentalenene           | humulene   |      |
| PubMed         | ShSTS4        | <i>Stereum hirsutum</i>          | hirsutene             | humulene   |      |
| PubMed         | ShSTS16       | <i>Stereum hirsutum</i>          | delta-6-protoilludene | humulene   |      |
| PubMed         | ShSTS17       | <i>Stereum hirsutum</i>          | delta-6-protoilludene | humulene   |      |
| PubMed         | ShSTS18       | <i>Stereum hirsutum</i>          | delta-6-protoilludene | humulene   |      |
| PubMed         | CPSTS17       | <i>Clitopilus pseudopinsitus</i> | beta-caryophyllene    | humulene   |      |
| PubMed         | ShSTS13       | <i>Stereum hirsutum</i>          | beta-caryophyllene    | humulene   |      |
| PubMed         | CPSTS4        | <i>Clitopilus pseudopinsitus</i> | 6-protoilludene       | humulene   |      |
| PubMed         | CPSTS7        | <i>Clitopilus pseudopinsitus</i> | alpha-farnesene       | acyclic    |      |
| PubMed         | ShSTS3        | <i>Stereum hirsutum</i>          | beta-farnesene        | acyclic    |      |
| PubMed         | ShSTS15       | <i>Stereum hirsutum</i>          | delta-6-protoilludene | humulene   |      |
| JGI ID: 825684 | Pilcr_825684  | <i>Piloderma croceum</i>         | gamma-cadinene        | germacrene |      |
| JGI ID: 47084  | Sphst_47084   | <i>Stereum hirsutum</i>          | Viridiflorol          | germacrene |      |
| JGI ID: 659367 | Denbi1_659367 | <i>Dendrothele bispora</i>       | delta-6-protoilludene | humulene   |      |
| JGI ID: 816208 | Denbi1_816208 | <i>Dendrothele bispora</i>       | Viridiflorol          | germacrene |      |
| JGI ID: 104215 | Galma_104215  | <i>Galerina marginata</i>        | beta-Gurjunene        | germacrene |      |
| JGI ID: 454193 | Hetan2_454193 | <i>Heterobasidion annosum</i>    | delta-6-protoilludene | humulene   |      |
| JGI ID: 138665 | Hypsu1_138665 | <i>Hypholoma sublateritium</i>   | delta-6-protoilludene | humulene   |      |
| MN146024       | Agr1          | <i>Agrocybe aegerita</i>         | delta-cadinene        | germacrene |      |
| MN146025       | Agr2          | <i>Agrocybe aegerita</i>         | viridiflorene         | germacrene |      |
| MN146026       | Agr3          | <i>Agrocybe aegerita</i>         | alpha-Muurolene       | germacrene |      |
| MN146027       | Agr4          | <i>Agrocybe aegerita</i>         | delta-cadinene        | germacrene |      |
| MN146028       | Agr5          | <i>Agrocybe aegerita</i>         | Viridiflorol          | germacrene |      |
| MN146029       | Agr6          | <i>Agrocybe aegerita</i>         | delta-6-protoilludene | humulene   |      |
| MN146030       | Agr7          | <i>Agrocybe aegerita</i>         | delta-6-              | humulene   |      |

|                   |          |                                             |                            |            |      |
|-------------------|----------|---------------------------------------------|----------------------------|------------|------|
|                   |          |                                             | protoilludene              |            |      |
| MN146031          | Agr8     | <i>Agrocybe aegerita</i>                    | gamma-Muurolene            | germacrene |      |
| MN146032          | Agr9     | <i>Armillaria gallica</i>                   | delta-6-<br>protoilludene  | humulene   |      |
| JGI:77541         | SiTPS    | <i>Serendipita indica</i>                   | viridiflorene              | germacrene | [20] |
| <b>Ascomycota</b> |          |                                             |                            |            |      |
| A0A516F405        | peniA    | <i>Penicillium patulum</i>                  | silphiene                  | humulene   | [21] |
| A0A284RNH4        | PRO1     | <i>Armillaria ostoyae</i>                   | delta-6-<br>protoilludene  | humulene   | [22] |
| PubMed            | FgJ09920 | <i>Fusarium graminearum</i>                 | koraiol                    | humulene   | [23] |
| AKE33935.1        | CaTPS    | <i>Colletotrichum acutatum</i>              | beta-caryophyllene         | humulene   | [24] |
| JGI ID:17536      | EC12-PGS | <i>Daldinia eschscholzii</i>                | alpha-guaiene              | germacrene | [25] |
| JGI ID:24646      | EC12-SS  | <i>Daldinia eschscholzii</i><br><i>EC12</i> | alpha-selinene             | germacrene |      |
| JGI ID:372695     | EC38-CS  | <i>Hypoxylon sp. EC38</i>                   | caryophyllene              | humulene   |      |
| JGI ID:397991     | CO27-CS  | <i>Hypoxylon sp. CO27</i>                   | alpha-caryophyllene        | humulene   |      |
| JGI ID:6706       | CI4A-CS  | <i>Hypoxylon sp. CI4A</i>                   | alpha-caryophyllene        | humulene   |      |
| JGI ID:70183      | EC12-ILS | <i>Daldinia eschscholzii</i><br><i>EC12</i> | (-)-isolekene              | germacrene |      |
| B6H063            | prx2     | <i>Penicillium chrysogenum</i>              | (+)-aristolochene          | germacrene | [26] |
| CCT65043          | FfSTC3   | <i>Fusarium fujikuroi</i>                   | (+)-eremophilene           | germacrene | [27] |
| CCT75704          | FfSTC5   | <i>Fusarium fujikuroi</i>                   | Guaiadiene                 | germacrene |      |
| AHY23920          | Hyp1     | <i>Hypoxylon sp. E7406B</i>                 | nerolidol                  | acyclic    | [28] |
| AHY23921          | Hyp2     | <i>Hypoxylon sp. E7406B</i>                 | delta-cadinene             | germacrene |      |
| PubMed            | Dial     | <i>Diaporthe sp.</i>                        | delta-6-<br>protoilludene  | humulene   | [29] |
| PubMed            | Tvi09626 | <i>Trichoderma viride</i>                   | trichobrasileno            | humulene   | [30] |
| CCP20071          | Ffsc6    | <i>Fusarium fujikuroi</i>                   | koraiol                    | humulene   | [31] |
| AAQ16575          | BcBOT2   | <i>Botrytis cinerea</i>                     | presilphiperfolan-8beta-ol | humulene   | [32] |
| Q9UR08            | AtAS     | <i>Aspergillus terreus</i>                  | (+)-aristolochene          | germacrene | [33] |
| Q03471            | Ari1     | <i>Penicillium roqueforti</i>               | (+)-aristolochene          | germacrene | [34] |
| BBK61014.1        | TaTC6    | <i>Trichoderma atroviride</i>               | trichobrasileno            | humulene   | [35] |

**Table S3.** TDTs selected for heterologous expression.

| Gene name              | Organism                         | Division      | Identity <sup>#</sup> | Family in SSN |
|------------------------|----------------------------------|---------------|-----------------------|---------------|
| <i>ni15096-TDTs*</i>   | <i>Nigrospora sp.</i>            | Ascomycota    | D1M8S2 (36.46%)       | Others        |
| <i>bb12017-TDTs*</i>   | <i>Beauveria sp.</i>             | Ascomycota    | TvSTS_14 (28.6%)      | Others        |
| <i>an14053-TDTs*</i>   | <i>Arthrimum nigrum</i>          | Ascomycota    | FlvE (42.9%)          | 2             |
| <i>tv15005-TDTs*</i>   | <i>Trichoderma voglmayrii</i>    | Ascomycota    | ShSTS1 (25.94%)       | Others        |
| <i>cs15091-TDTs*</i>   | <i>Cochliobolus sativus</i>      | Ascomycota    | D1M8S2 (33.5%)        | 1             |
| <i>fs13303-TDTs*</i>   | <i>Fusarium sporotrichioides</i> | Ascomycota    | D1M8S2 (58.5%)        | 1             |
| <i>dd13390-TDTs*</i>   | <i>Dicarpella dryina</i>         | Ascomycota    | D1M8S2 (31.3%)        | 1             |
| <i>gm14063-TDTs-1*</i> | <i>Glomerella magna</i>          | Ascomycota    | LbSTS6 (50.5%)        | 6             |
| <i>gm14063-TDTs-2*</i> | <i>Glomerella magna</i>          | Ascomycota    | D1M8S2 (32.5%)        | 1             |
| <i>hc11550-TDTs*=</i>  | <i>Hapsidospora sp.</i>          | Basidiomycota | PitB (25.90%)         | Others        |
| <i>go15085-TDTs</i>    | <i>Ganoderma oregonense</i>      | Basidiomycota | TvSTS_16 (41.2%)      | 3             |
| <i>to17007-TDTs</i>    | <i>Trichoderma ovalisporum</i>   | Ascomycota    | ShSTS1 (26.3%)        | Others        |
| <i>ap17081-TDTs</i>    | <i>Arthrimum phaeospermum</i>    | Ascomycota    | D1M8S2 (34.1%)        | 1             |
| <i>hc17010-TDTs</i>    | <i>Hypomyces chrysospermus</i>   | Ascomycota    | D1M8S2 (29.9%)        | 4             |
| <i>fom14004-TDTs</i>   | <i>Fusarium oxysporum</i>        | Ascomycota    | D1M8S2 (36.8%)        | 1             |
| <i>np14056-TDTs=</i>   | <i>Neofusicoccum parvum</i>      | Ascomycota    | LbSTS6 (40.6%)        | 6             |
| <i>da15094-TDTs=</i>   | <i>Trametes gibbosa</i>          | Basidiomycota | PpSTS29 (35.5%)       | 9             |
| <i>fc13317-TDTs</i>    | <i>Fusarium culmorum</i>         | Ascomycota    | D1M8S2 (38.5%)        | 7             |
| <i>cc13107-TDTs=</i>   | <i>Clitocybe clavipes</i>        | Basidiomycota | AbSTS_07 (30.0%)      | 2             |
| <i>as13380-TDTs=</i>   | <i>Armillaria sinapina</i>       | Basidiomycota | ShSTS1 (44.7%)        | 5             |
| <i>da15073-TDTs=</i>   | <i>Diaporthaceae sp.</i>         | Ascomycota    | PitB (29.4%)          | Others        |
| <i>ms17109-TDTs=</i>   | <i>Mycena sanguinolenta</i>      | Basidiomycota | Q00835 (48.17%)       | 8             |
| <i>ps13126-TDTs=</i>   | <i>Phaeolus schweinitzii</i>     | Basidiomycota | FlvE (29.3%)          | Others        |

\* Active TDTs.

# The identity between TDTs in this work and reported previously.

= Synthesized genes.

**Table S4.** Primers used in this study.

| Gene                  | Restriction Site | Primer sequence 5'-3'                                                                                                  | Vector/Size       |
|-----------------------|------------------|------------------------------------------------------------------------------------------------------------------------|-------------------|
| <i>ap17081-TDTS</i>   | <i>KpnI</i>      | gcaagctccgAATTCGAGCTCATGGGGGACTG<br>GCAAAC (primer-F)<br>acgagctactacaGATCCCCGCTATTTACGCGTC<br>GAAACCTT (primer-R)     | pUARA4<br>1138 bp |
| <i>gm14063-TDTS-2</i> | <i>KpnI</i>      | agctccgAATTCGAGCTCGATGCACATTCAG<br>ATGAATGATATT (primer-F)<br>gagctactacaGATCCCCGGTCAAGCCGGACAT<br>TCCATAG (primer-R)  | pUARA4<br>1198 bp |
| <i>gm14063-TDTS-1</i> | <i>KpnI</i>      | agctccgAATTCGAGCTCGATGCCCATCGAA<br>GCTTCTC (primer-F)<br>gagctactacaGATCCCCGGCTAGACATGCAAG<br>TCAAGTTCT                | pUARA4<br>1325 bp |
| <i>go15085-TDTS</i>   | <i>KpnI</i>      | aagctccgAATTCGAGCTCGatgtattcattctcttccc<br>ag (primer-F)<br>cgagctactacaGATCCCCGGctaaggtgcggtacagtc<br>(primer-R)      | pUARA4<br>1253 bp |
| <i>ms13281-TDTS</i>   | <i>KpnI</i>      | aagctccgAATTCGAGCTCATGGTTTCCACAA<br>GTGAAATTTCCA (primer-F)<br>CCGAAGTTTGCGGACGACTAGCGGGGAT<br>Ctgtagtagctc (primer-R) | pUARA4<br>1064 bp |
| <i>tv15005-TDTS</i>   | <i>KpnI</i>      | caagctccgAATTCGAGCTCatggcgagtactttccacag<br>(primer-F)<br>cgagctactacaGATCCCCGttactcagtggtaccatactc<br>t (primer-R)    | pUARA4<br>1153 bp |
| <i>da15094-TDTS</i>   | <i>KpnI</i>      | aagctccgAATTCGAGCTCGatggccgaactcgattcta<br>g (primer-F)<br>gagctactacaGATCCCCGtcacatttgcgcaggeg                        | pUARA4<br>1076 bp |
| <i>dd13390-TDTS</i>   | <i>KpnI</i>      | caagctccgAATTCGAGCTCATGGGTTGCCAC<br>GAAAATGA (primer-F)<br>cgagctactacaGATCCCCGTTAGTTGCTGAAA<br>ACCCGTT (primer-R)     | pUARA4<br>1300 bp |
| <i>fs13303-TDTS</i>   | <i>KpnI</i>      | agctccgAATTCGAGCTCGATGATCGCTGCA<br>CCGAG (primer-F)<br>gagctactacaGATCCCCGGTTAGTTCCTCTGG<br>ACAATTCCTTT                | pUARA4<br>1278 bp |
| <i>fom14004-TDTS</i>  | <i>KpnI</i>      | caagctccgAATTCGAGCTCatgtttatggtcggaagcca<br>(primer-F)<br>cgagctactacaGATCCCCGetaaggccccagegc<br>(primer-R)            | pUARA4<br>1152 bp |
| <i>au11219-TDTS</i>   | <i>KpnI</i>      | cgAATTCGAGCTCGGTACCATGCTTCAACC<br>CAGTTCAGTT (primer-F)<br>GACGGTGATCTCGTTTGCTAACGGGGATC<br>ttagtagctc (primer-R)      | pUARA4<br>1321 bp |
| <i>pm17515-TDTS</i>   | <i>KpnI</i>      | aagctccgAATTCGAGCTCATGGACCGTATTA<br>CTCCCAA (primer-F)<br>gagctactacaGATCCCCGCTATGATCCAAACG<br>ACCACAC (primer-R)      | pUARA4<br>1252 bp |
| <i>di11573-TDTS</i>   | <i>KpnI</i>      | aagctccgAATTCGAGCTCATGTTGCGCAATT<br>ATGTGCGT (primer-F)<br>gagctactacaGATCCCCGTCAGACAACAAAA<br>GCTGCCTG (primer-R)     | pUARA4<br>1352 bp |
| <i>bb12017-</i>       | <i>KpnI</i>      | agctccgAATTCGAGCTCGATGACTCCAGGC                                                                                        | pUARA4            |



|                    |             |                                                                                                                                  |                   |
|--------------------|-------------|----------------------------------------------------------------------------------------------------------------------------------|-------------------|
| <i>TDS</i>         |             | ACGGA (primer-F)<br>gagctactacaGATCCCCGGTTATTGGATAGCTA<br>TTCCGATTTCTTC (primer-R)                                               | 975 bp            |
| <i>ph10046-TDS</i> | <i>KpnI</i> | aagctccgAATTCGAGCTCATGTCCCATTCAC<br>GCCACGAC (primer-F)<br>GTTACTGCCGTAGAGGTTTGACGGGGATC<br>tgtagtagctc (primer-R)               | pUARA4<br>1274 bp |
| <i>hc17010-TDS</i> | <i>KpnI</i> | GcaagctccgAATTCGAGCTCATGGAGCCCAA<br>GGTCTTC (primer-F)<br>acgagctactacaGATCCCCGTCACCGATTTTGC<br>CATTCATC (primer-R)              | pUARA4<br>1164 bp |
| <i>hc11500-TDS</i> | <i>KpnI</i> | agctccgAATTCGAGCTCATGGTATGAACCGT<br>TTGAAAAAGC (primer-F)<br>cgagctactacaGATCCCCGtcagGCTCTGCAAGT<br>CTGCA (primer-R)             | pUARA4<br>1251 bp |
| <i>cs15091-TDS</i> | <i>KpnI</i> | aagctccgAATTCGAGCTCATGGGACATTCTG<br>CCAAAGAC (primer-F)<br>cgagctactacaGATCCCCGCTAGCCTGCAAAC<br>ACTTCCT (primer-R)               | pUARA4<br>1140 bp |
| <i>an14053-TDS</i> | <i>KpnI</i> | GcaagctccgAATTCGAGCTCATGACTGCTGC<br>AGAGTTC (primer-F)<br>acgagctactacaGATCCCCGTCAGCGAACCAG<br>AACCC (primer-R)                  | pUARA4<br>1161 bp |
| <i>np14056-TDS</i> | <i>KpnI</i> | GcaagctccgAATTCGAGCTCATGCATCTCGC<br>GATAGAACA (primer-F)<br>cgagctactacaGATCCCCGCTAAAGATGACTT<br>TGCGTCTCC (primer-R)            | pUARA4<br>1354 bp |
| <i>fc13317-TDS</i> | <i>KpnI</i> | AGCTCCGAATTCGAGCTCATGGGCATTTG<br>GCTATCA (primer-F)<br>ACGAGCTACTACAGATCCCCGTTATGTATC<br>GATGCTCTGAGCT (primer-R)                | pUARA4<br>1247 bp |
| <i>ni15096-TDS</i> | <i>KpnI</i> | AGCTCCGAATTCGAGCTCATGGTCTGTAG<br>CATTTTCTGTTC AACAGTA (primer-F)<br>ACGAGCTACTACAGATCCCCGTTAGGAAG<br>TCTTGGCCACCTCCTT (primer-R) | pUARA4<br>1578 bp |

---

**Table S5.** Plasmids and transformants constructed in this study.

| <b>Plasmid</b>                | <b>Gene to be expressed</b> | <b>Transformant</b>       |
|-------------------------------|-----------------------------|---------------------------|
| pUARA4- <i>ap17081-TDTS</i>   | <i>ap17081-TDTS</i>         | AO- <i>ap17081-TDTS</i>   |
| pUARA4- <i>gm14063-TDTS-2</i> | <i>gm14063-TDTS-2</i>       | AO- <i>gm14063-TDTS-2</i> |
| pUARA4- <i>gm14063-TDTS-1</i> | <i>gm14063-TDTS-1</i>       | AO- <i>gm14063-TDTS-1</i> |
| pUARA4- <i>go15085-TDTS</i>   | <i>go15085-TDTS</i>         | AO- <i>go15085-TDTS</i>   |
| pUARA4- <i>ms13281-TDTS</i>   | <i>ms13281-TDTS</i>         | AO- <i>ms13281-TDTS</i>   |
| pUARA4- <i>tv15005-TDTS</i>   | <i>tv15005-TDTS</i>         | AO- <i>tv15005-TDTS</i>   |
| pUARA4- <i>da15094-TDTS</i>   | <i>da15094-TDTS</i>         | AO- <i>da15094-TDTS</i>   |
| pUARA4- <i>dd13390-TDTS</i>   | <i>dd13390-TDTS</i>         | AO- <i>dd13390-TDTS</i>   |
| pUARA4- <i>fs13303-TDTS</i>   | <i>fs13303-TDTS</i>         | AO- <i>fs13303-TDTS</i>   |
| pUARA4- <i>fom14004-TDTS</i>  | <i>fom14004-TDTS</i>        | AO- <i>fom14004-TDTS</i>  |
| pUARA4- <i>au11219-TDTS</i>   | <i>au11219-TDTS</i>         | AO- <i>au11219-TDTS</i>   |
| pUARA4- <i>pm17515-TDTS</i>   | <i>pm17515-TDTS</i>         | AO- <i>pm17515-TDTS</i>   |
| pUARA4- <i>di11573-TDTS</i>   | <i>di11573-TDTS</i>         | AO- <i>di11573-TDTS</i>   |
| pUARA4- <i>bb12017-TDTS</i>   | <i>bb12017-TDTS</i>         | AO- <i>bb12017-TDTS</i>   |
| pUARA4- <i>ph10046-TDTS</i>   | <i>ph10046-TDTS</i>         | AO- <i>ph10046-TDTS</i>   |
| pUARA4- <i>hc17010-TDTS</i>   | <i>hc17010-TDTS</i>         | AO- <i>hc17010-TDTS</i>   |
| pUARA4- <i>hc11500-TDTS</i>   | <i>hc11500-TDTS</i>         | AO- <i>hc11500-TDTS</i>   |
| pUARA4- <i>cs15091-TDTS</i>   | <i>cs15091-TDTS</i>         | AO- <i>cs15091-TDTS</i>   |
| pUARA4- <i>an14053-TDTS</i>   | <i>an14053-TDTS</i>         | AO- <i>an14053-TDTS</i>   |
| pUARA4- <i>np14056-TDTS</i>   | <i>np14056-TDTS</i>         | AO- <i>np14056-TDTS</i>   |
| pUARA4- <i>fc13317-TDTS</i>   | <i>fc13317-TDTS</i>         | AO- <i>fc13317-TDTS</i>   |
| pUARA4- <i>ni15096-TDTS</i>   | <i>ni15096-TDTS</i>         | AO- <i>ni15096-TDTS</i>   |

## Reference

1. Zhang, T.; Feng, J.; He, W.; Rong, X.; Lv, H.; Li, J.; Li, X.; Wang, H.; Wang, L.; Zhang, L.; et al. Genomic and transcriptomic approaches provide a predictive framework for sesquiterpene biosynthesis in *Desarmillaria tabescens* CPCC 401429. *J Fungi (Basel)* **2023**, *9*, 481, doi:10.3390/jof9040481.
2. Lopez-Gallego, F.; Agger, S.A.; Abate-Pella, D.; Distefano, M.D.; Schmidt-Dannert, C. Sesquiterpene synthases Cop4 and Cop6 from *Coprinus cinereus*: catalytic promiscuity and cyclization of farnesyl pyrophosphate geometric isomers. *Chembiochem* **2010**, *11*, 1093–1106, doi:10.1002/cbic.200900671.
3. Wawrzyn, G.T.; Quin, M.B.; Choudhary, S.; Lopez-Gallego, F.; Schmidt-Dannert, C. Draft genome of *Omphalotus olearius* provides a predictive framework for sesquiterpenoid natural product biosynthesis in Basidiomycota. *Chem Biol* **2012**, *19*, 772–783, doi:10.1016/j.chembiol.2012.05.012.
4. Shota, N.; Chengwei, L.; Jumpei, N.; Takuto, K.; Kaho, S.; Yoshiro, S.; Atsushi, M.; Taro, O.; Claudia, S.; Maruyama, J.; et al. Ascomycete *Aspergillus oryzae* is an efficient expression host for production of basidiomycete terpenes by using genomic DNA sequences. *Appl Environ Microbiol* **2019**, *85*(15), e00409–00419, doi:10.1128/AEM.
5. Masunaga, N.; Kitaoka, T.; Ichinose, H. Biocatalyst collection and heterologous expression of sesquiterpene synthases from basidiomycetous fungi: Discovery of a novel sesquiterpene hydrocarbon. *Microb Biotechnol* **2022**, *16*, 632–644, doi:10.1111/1751-7915.14204.
6. Bahadoor, A.; Schneiderman, D.; Gemmill, L.; Bosnich, W.; Blackwell, B.; Melanson, J.E.; McRae, G.; Harris, L.J. Hydroxylation of longiborneol by a Clm2-encoded CYP450 monooxygenase to produce culmorin in *Fusarium graminearum*. *J Nat Prod* **2016**, *79*, 81–88, doi:10.1021/acs.jnatprod.5b00676.
7. Yee, D.A.; Kakule, T.B.; Cheng, W.; Chen, M.; Chong, C.T.Y.; Hai, Y.; Hang, L.F.; Hung, Y.S.; Liu, N.; Ohashi, M.; et al. Genome mining of alkaloidal terpenoids from a hybrid terpene and nonribosomal peptide biosynthetic pathway. *J Am Chem Soc* **2020**, *142*, 710–714, doi:10.1021/jacs.9b13046.
8. Nosenko, T.; Zimmer, I.; Ghirardo, A.; Kollner, T.G.; Weber, B.; Polle, A.; Rosenkranz, M.; Schnitzler, J.P. Predicting functions of putative fungal sesquiterpene synthase genes based on multiomics data analysis. *Fungal Genet Biol* **2023**, *165*, 103779, doi:10.1016/j.fgb.2023.103779.
9. Proctor, R.H.; McCormick, S.P.; Kim, H.S.; Cardoza, R.E.; Stanley, A.M.; Lindo, L.; Kelly, A.; Brown, D.W.; Lee, T.; Vaughan, M.M.; et al. Evolution of structural diversity of trichothecenes, a family of toxins produced by plant pathogenic and entomopathogenic fungi. *PLoS Pathog* **2018**, *14*, e1006946, doi:10.1371/journal.ppat.1006946.
10. Ichinose, H.; Kitaoka, T. Insight into metabolic diversity of the brown-rot basidiomycete *Postia placenta* responsible for sesquiterpene biosynthesis: semi-comprehensive screening of cytochrome P450 monooxygenase involved in protoilludene metabolism. *Microb Biotechnol* **2018**, *11*, 952–965,

doi:10.1111/1751-7915.13304.

11. Li, R.; Yao, B.; Zeng, H. Identification and characterization of a nerol synthase in fungi. *J Agric Food Chem* **2023**, *72*, 416–423, doi:10.1021/acs.jafc.3c07573.
12. Ichinose, H.; Ukeba, S.; Kitaoka, T. Latent potentials of the white-rot basidiomycete *Phanerochaete chrysosporium* responsible for sesquiterpene metabolism: CYP5158A1 and CYP5144C8 decorate (E)-alpha-bisabolene. *Enzyme Microb Technol* **2022**, *158*, 110037, doi:10.1016/j.enzmictec.2022.110037.
13. Al-Salihi, S.A.A.; Dao, T.T.; Williams, K.; Bailey, A.M.; Foster, G.D. The biogenetic origin of the biologically active naematolin of *Hypholoma* species involves an unusual sesquiterpene synthase. *Mol Biotechnol* **2019**, *61*, 754–762, doi:10.1007/s12033-019-00199-x.
14. Burkhardt, I.; Kreuzenbeck, N.B.; Beemelmans, C.; Dickschat, J.S. Mechanistic characterization of three sesquiterpene synthases from the termite-associated fungus *Termitomyces*. *Org Biomol Chem* **2019**, *17*, 3348–3355, doi:10.1039/c8ob02744g.
15. Lackner, G.; Peters, E.E.; Helfrich, E.J.; Piel, J. Insights into the lifestyle of uncultured bacterial natural product factories associated with marine sponges. *Proc Natl Acad Sci U S A* **2017**, *114*, E347–E356, doi:10.1073/pnas.1616234114.
16. Mischko, W.; Hirte, M.; Fuchs, M.; Mehlmer, N.; Bruck, T.B. Identification of sesquiterpene synthases from the Basidiomycota *Coniophora puteana* for the efficient and highly selective beta-copaene and cubebol production in *E. coli*. *Microb Cell Fact* **2018**, *17*, 164, doi:10.1186/s12934-018-1010-z.
17. Yap, H.Y.; Muria-Gonzalez, M.J.; Kong, B.H.; Stubbs, K.A.; Tan, C.S.; Ng, S.T.; Tan, N.H.; Solomon, P.S.; Fung, S.Y.; Chooi, Y.H. Heterologous expression of cytotoxic sesquiterpenoids from the medicinal mushroom *Lignosus rhinocerotis* in yeast. *Microb Cell Fact* **2017**, *16*, 103, doi:10.1186/s12934-017-0713-x.
18. Agger, S.; Lopez-Gallego, F.; Schmidt-Dannert, C. Diversity of sesquiterpene synthases in the basidiomycete *Coprinus cinereus*. *Molecular Microbiology* **2009**, *72*, 1181–1195, doi:10.1111/j.1365-2958.2009.06717.x.
19. Zhang, C.; Chen, X.; Orban, A.; Shukal, S.; Birk, F.; Too, H.P.; Ruhl, M. *Agrocybe aegerita* serves as a gateway for identifying sesquiterpene biosynthetic enzymes in higher fungi. *ACS Chem Biol* **2020**, *15*, 1268–1277, doi:10.1021/acscchembio.0c00155.
20. Ntana, F.; Bhat, W.W.; Johnson, S.R.; Jorgensen, H.J.L.; Collinge, D.B.; Jensen, B.; Hamberger, B. A sesquiterpene synthase from the endophytic fungus *Serendipita indica* catalyzes formation of viridiflorol. *Biomolecules* **2021**, *11*, 898, doi:10.3390/biom11060898.
21. Zeng, H.; Yin, G.; Wei, Q.; Li, D.; Wang, Y.; Hu, Y.; Hu, C.; Zou, Y. Unprecedented [5.5.5.6]dioxafenestrane ring construction in fungal insecticidal sesquiterpene biosynthesis. *Angew Chem Int Ed Engl* **2019**, *58*, 6569–6573, doi:10.1002/anie.201813722.

22. Li, Z.; Wang, Y.; Jiang, B.; Li, W.; Zheng, L.; Yang, X.; Bao, Y.; Sun, L.; Huang, Y.; Li, Y. Structure, cytotoxic activity and mechanism of protoilludane sesquiterpene aryl esters from the mycelium of *Armillaria mellea*. *J Ethnopharmacol* **2016**, *184*, 119–127, doi:10.1016/j.jep.2016.02.044.
23. Yuan, Y.; Litzenburger, M.; Cheng, S.; Bian, G.; Hu, B.; Yan, P.; Cai, Y.; Deng, Z.; Bernhardt, R.; Liu, T. Sesquiterpenoids produced by combining two sesquiterpene cyclases with promiscuous myxobacterial CYP260B1. *Chembiochem* **2019**, *20*, 677–682, doi:10.1002/cbic.201800670.
24. Buchvaldt Amby, D.; Manczak, T.; Petersen, M.A.; Sundelin, T.; Weitzel, C.; Grajewski, M.; Simonsen, H.T.; Jensen, B. Role of the *Colletotrichum acutatum* sesquiterpene synthase CaTPS in the biosynthesis of sesquiterpenoids. *Microbiology (Reading)* **2016**, *162*, 1773–1783, doi:10.1099/mic.0.000361.
25. Wu, W.; Tran, W.; Taatjes, C.A.; Alonso-Gutierrez, J.; Lee, T.S.; Gladden, J.M. Rapid discovery and functional characterization of terpene synthases from four endophytic *Xylariaceae*. *PLoS One* **2016**, *11*, e0146983, doi:10.1371/journal.pone.0146983.
26. Hidalgo, P.I.; Ullan, R.V.; Albillos, S.M.; Montero, O.; Fernandez-Bodega, M.A.; Garcia-Estrada, C.; Fernandez-Aguado, M.; Martin, J.F. Molecular characterization of the PR-toxin gene cluster in *Penicillium roqueforti* and *Penicillium chrysogenum*: cross talk of secondary metabolite pathways. *Fungal Genet Biol* **2014**, *62*, 11–24, doi:10.1016/j.fgb.2013.10.009.
27. Burkhardt, I.; Siemon, T.; Henrot, M.; Studt, L.; R  sler, S.; Tudzynski, B.; Christmann, M.; Dickschat, J.S. Mechanistic characterisation of two sesquiterpene cyclases from the plant pathogenic fungus *Fusarium fujikuroi*. *Angew. Chem. Int. Ed* **2016**, *55*, 8748–8751, doi: 10.1002/anie.201603782.
28. Shaw, J.J.; Berbasova, T.; Sasaki, T.; Jefferson-George, K.; Spakowicz, D.J.; Dunican, B.F.; Portero, C.E.; Narvaez-Trujillo, A.; Strobel, S.A. Identification of a fungal 1,8-cineole synthase from *Hypoxylon* sp. with specificity determinants in common with the plant synthases. *J Biol Chem* **2015**, *290*, 8511–8526, doi:10.1074/jbc.M114.636159.
29. de Sena Filho, J.G.; Quin, M.B.; Spakowicz, D.J.; Shaw, J.J.; Kucera, K.; Dunican, B.; Strobel, S.A.; Schmidt-Dannert, C. Genome of *Diaporthe* sp. provides insights into the potential inter-phylum transfer of a fungal sesquiterpenoid biosynthetic pathway. *Fungal Biol* **2016**, *120*, 1050–1063, doi:10.1016/j.funbio.2016.04.001.
30. Sun, X.; Cai, Y.S.; Yuan, Y.; Bian, G.; Ye, Z.; Deng, Z.; Liu, T. Genome mining in *Trichoderma viride* J1-030: discovery and identification of novel sesquiterpene synthase and its products. *Beilstein J Org Chem* **2019**, *15*, 2052–2058, doi:10.3762/bjoc.15.202.
31. Brock, N.L.; Huss, K.; Tudzynski, B.; Dickschat, J.S. Genetic dissection of sesquiterpene biosynthesis by *Fusarium fujikuroi*. *Chembiochem* **2013**, *14*, 311–315, doi:10.1002/cbic.201200695.
32. Moraga, J.; Dalmais, B.; Izquierdo-Bueno, I.; Aleu, J.; Hanson, J.R.;

- Hernandez-Galan, R.; Viaud, M.; Collado, I.G. Genetic and molecular basis of botrydial biosynthesis: connecting cytochrome P450-encoding genes to biosynthetic intermediates. *ACS Chem Biol* **2016**, *11*, 2838–2846, doi:10.1021/acscchembio.6b00581.
33. Proctor, R.H.; Hohn, T.M. Aristolochene synthase. Isolation, characterization, and bacterial expression of a sesquiterpenoid biosynthetic gene (Ari1) from *Penicillium roqueforti*. *Journal of Biological Chemistry* **1993**, *268*, 4543–4548, doi:10.1016/s0021-9258(18)53644-9.
34. Cane, D.E.; Kang, I. Aristolochene synthase: purification, molecular cloning, high-level expression in *Escherichia coli*, and characterization of the *Aspergillus terreus* cyclase. *Arch Biochem Biophys* **2000**, *376*, 354–364, doi:10.1006/abbi.2000.1734.
35. Murai, K.; Lauterbach, L.; Teramoto, K.; Quan, Z.; Barra, L.; Yamamoto, T.; Nonaka, K.; Shiomi, K.; Nishiyama, M.; Kuzuyama, T.; et al. An unusual skeletal rearrangement in the biosynthesis of the sesquiterpene trichobrasilenol from *Trichoderma*. *Angew Chem Int Ed Engl* **2019**, *58*, 15046–15050, doi:10.1002/anie.201907964.
